# Supplementary material
Source: MDPI journal article supplement (https://www.mdpi.com/2410-3888/6/4/61)
Supplement: s1 [file s1]

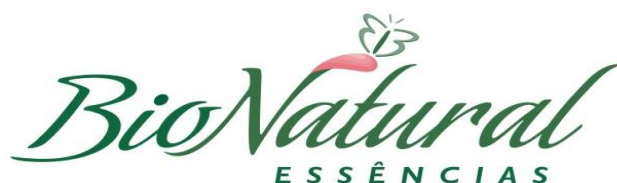

## ANALYSIS REPORT

### CHROMATOGRAPHIC ANALYSIS OF ESSENTIAL OILS

Applicant: Bio Natural Essencias

Venue: Rua Daltro Filho, 301 – Tres Passos - RS

Sample identification: Citronella (Cymbopogon nardus)

Extraction: 27/02/2017

Lot: 02/17

Validity: 24 months

| Citronella                  |                     |
|-----------------------------|---------------------|
| Active principle            | Extraction 27/02/17 |
| Citronelal (%)              | 39.00               |
| Citronelol (%)              | 19.82               |
| Geraniol (%)                | 17.00               |
| Other components (%)        | 22.86               |
| Unidentified components (%) | 1.32                |

Tres Passos, March 09, 2017.

**PHYSICAL-CHEMICAL PROPERTIES:** Appearance / Aspect: Translucent Liquid; Color: Light Yellow / Light Amber; Impurities: Free.; Odor: Characteristic; Density at 20°C: 0.8760 - 0.8960; Refraction index at 20°C: 1.4590 - 1.4790; pH value: Not determined; Viscosity: Not determined; Freezing point: Not determined; Flash point: 60°C; Melting point: Not determined; Flammable properties: Not determined; Explosive properties: Not expected; Oxidizing properties: Not expected; Steam pressure: Not determined; Shelf Life: 12 Months.

Deonise Mrozinski Irgang

CREA /RS 199195
